# Supplementary material
Source: PubMed Central journal article supplement (PMC3146306)

**Figure e-1**

Scattered plasma cells (VS38 immunohistochemistry) were present in the leptomeninges and parenchymal perivascular spaces (A). They were not seen diffusely infiltrating the parenchyma. IgG deposition was very heterogeneous. Positivity was seen over white matter astrocytes in cerebellar folia (B) and Bergmann glia. It was also seen over the cytoplasm of some oligodendrocytes (B). Purkinje cells close to an inflammatory focus were also strongly positive (C), but those remote to a florid lesion were often negative. There was also diffuse IgG decoration on dendritic branches (C). (bars = 20 microns).

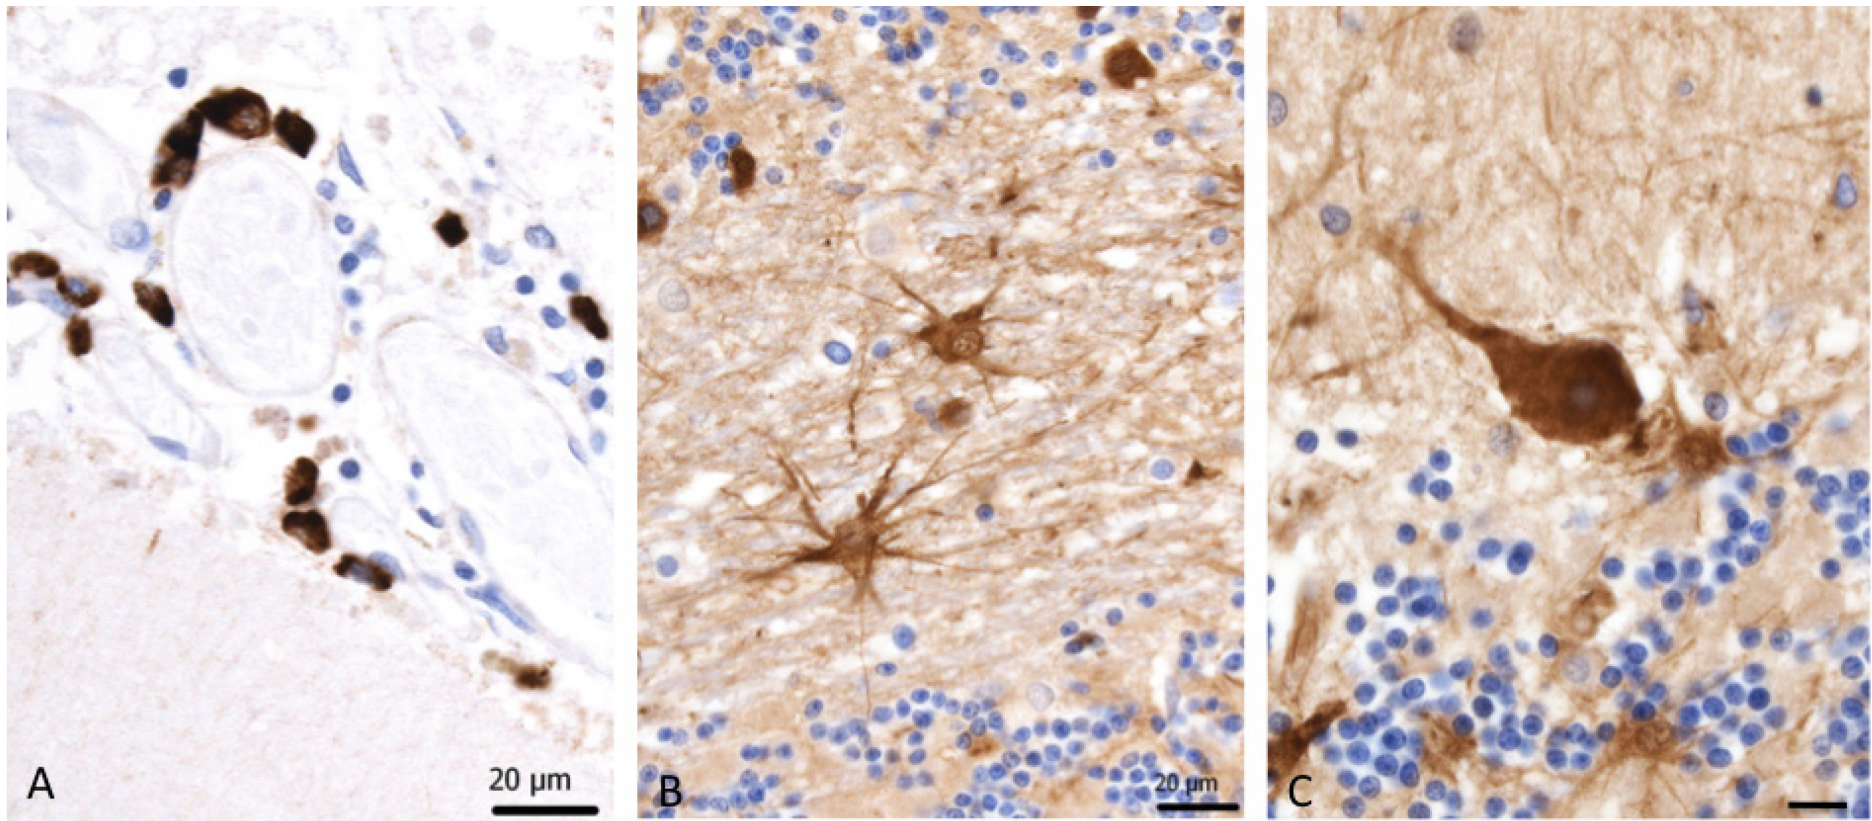

Supplement: supp_WNL.0b013e318227b176_Figure_e-1.pdf [file supp_WNL.0b013e318227b176_Figure_e-1.pdf]
